# Supplementary material for: Bioactive Carboxymethyl Starch-Based Hydrogels Decorated with CuO Nanoparticles: Antioxidant and Antimicrobial Properties and Accelerated Wound Healing In Vivo
Source: PubMed Central journal article supplement (PMC7959477; doi:10.3390/ijms22052531), 2021-03-03
Supplement: ijms-22-02531-s001.pdf [file ijms-22-02531-s001.pdf]

# Bioactive Carboxymethyl Starch-Based Hydrogels Decorated with CuO Nanoparticles: Antioxidant and Antimicrobial Properties and Accelerated Wound Healing In Vivo

Zahra Abdollahi <sup>1</sup>, Ehsan Nazarzadeh Zare <sup>1,\*</sup>, Fatemeh Salimi <sup>2</sup>, Iran Goudarzi <sup>2</sup>, Franklin R. Tay <sup>3</sup>, and Pooyan Makvandi <sup>4,\*</sup>

- <sup>1</sup> School of Chemistry, Damghan University, Damghan 36716-41167, Iran; zahra.yalda.abdollahi@gmail.com  
<sup>2</sup> School of Biology, Damghan University, Damghan, 36716-41167, Iran; f.salimi@du.ac.ir (F.S.); irangoudarzi@du.ac.ir (I.G.)  
<sup>3</sup> The Graduate School, Augusta University, Augusta, GA 30912, USA; tayfranklin7@gmail.com  
<sup>4</sup> Istituto Italiano di Tecnologia, Centre for Materials Interface, viale Rinaldo Piaggio 34, 56025 Pontedera, Pisa, Italy  
\* Correspondence: ehsan.nazarzadehzare@gmail.com; e.nazarzadeh@du.ac.ir; Tel.: +982335220095 (E.N.Z.); pooyanmakvandi@gmail.com (P.M.)

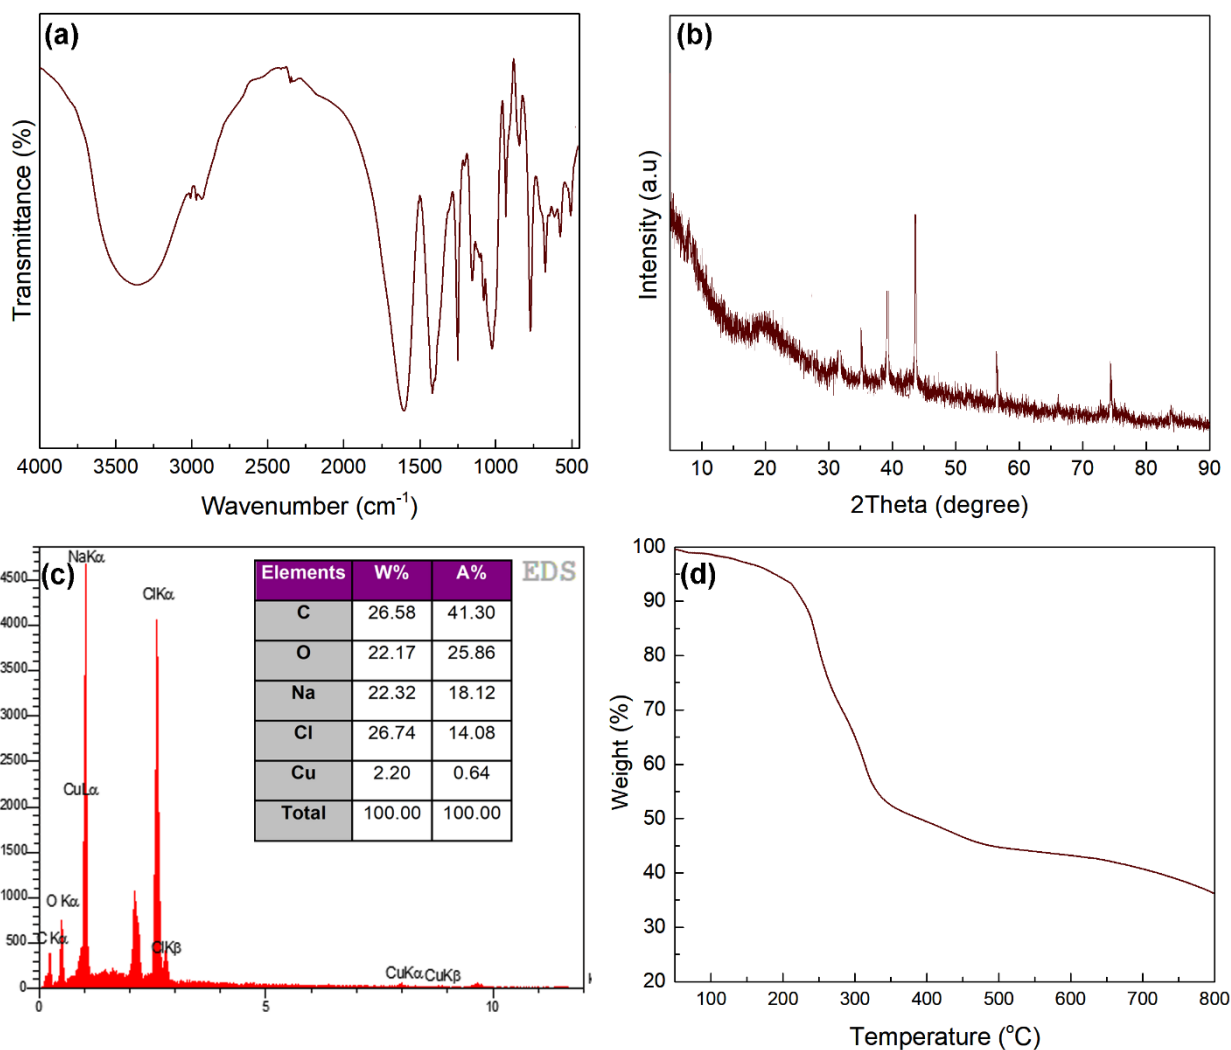

Figure S1. FTIR spectrum (a), XRD pattern (b), EDS spectrum (c), and TGA curve (d) of the CMS@4%CuO nanocomposite hydrogel.

**Table S1.** UV-vis data of antioxidant activities of CMS, CuO nanoparticles, CMS@2%CuO, and CMS@4%CuO nanocomposite hydrogels in methanolic DPPH· solution.  $A_b$ , the absorbance of DPPH solution at 517 nm;  $A_s$ , the absorbance of each sample in DPPH solution at 517 nm.

| <b>Samples</b>    | <b><math>A_b</math></b> | <b><math>A_s</math></b> | <b>DPPH %</b> |
|-------------------|-------------------------|-------------------------|---------------|
| CMS               | 0.450                   | 0.283                   | 37            |
| CuO nanoparticles | 0.450                   | 0.112                   | 75            |
| CMS@2%CuO         | 0.450                   | 0.090                   | 80            |
| CMS@4%CuO         | 0.450                   | 0.081                   | 82            |
